# Supplementary material
Source: Springer Nature journal article supplement (https://www.springermedizin.de/resource/supplementary/12879_2012_2108_MOESM2_ESM.pdf/9443646)

**A.**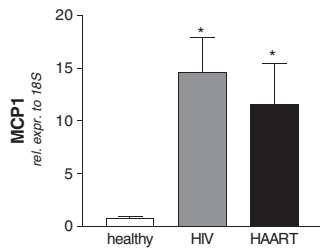**B.**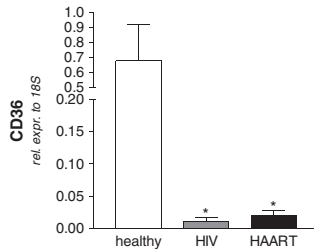**C.**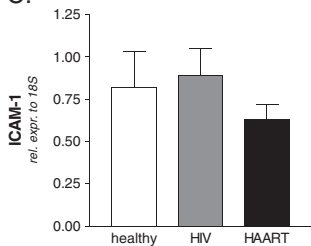**D.**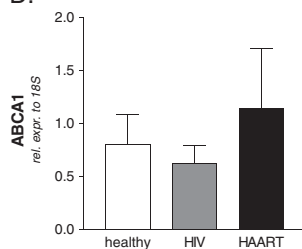**E.**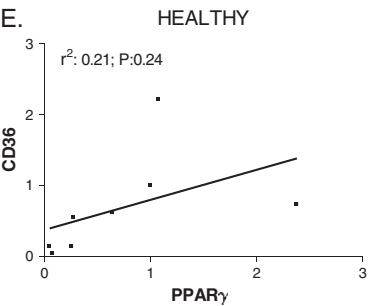**F.**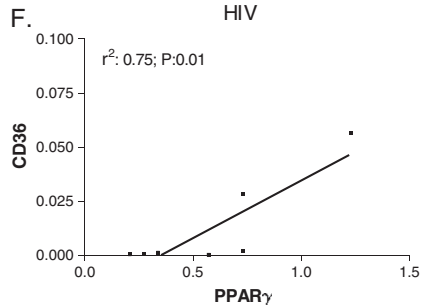**G.**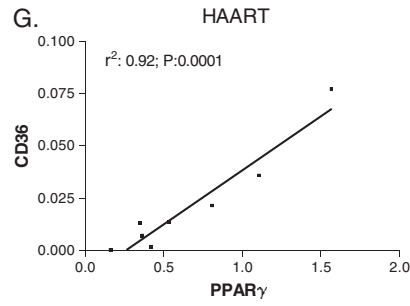

Supplement: MOESM2 [file 9443646]
